# Supplementary material for: High-performance electrochemical sensing platform based on sodium alginate-derived 3D hierarchically porous carbon for simultaneous determination of dihydroxybenzene isomers
Source: Royal Society of Chemistry journal article supplement (doi:10.1039/d0ay02240c), 2021-01-01
Supplement: d0ay02240c1.pdf [file d0ay02240c1.pdf]

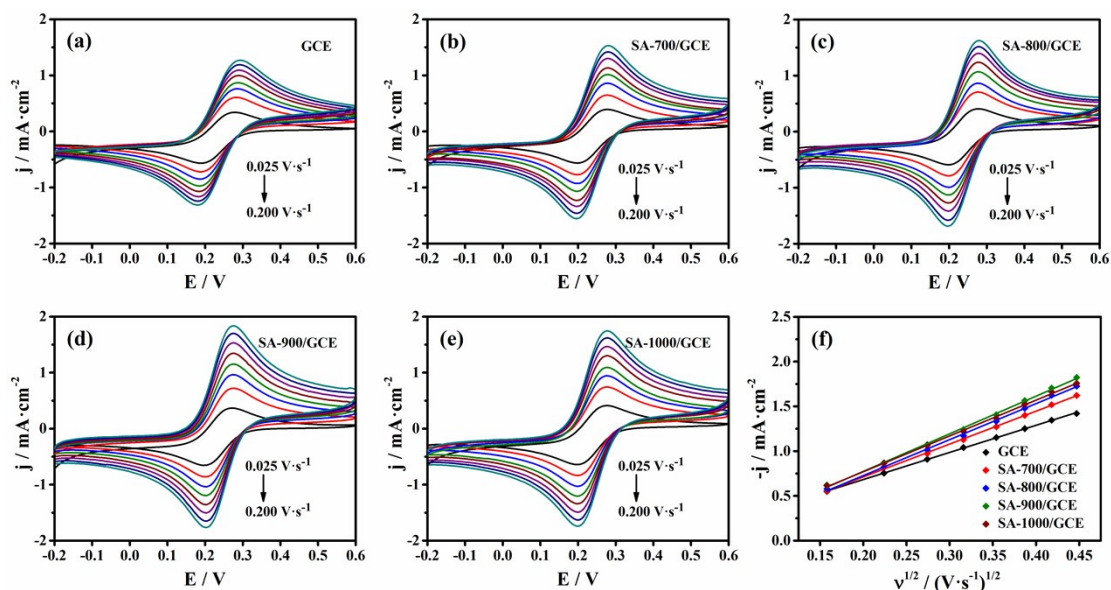

**Fig. S1** Cyclic voltammograms of a bare GCE (a), a SA-700/GCE (b), a SA-800/GCE (c), a SA-900/GCE (d) and a SA-1000/GCE (e) at different scan rates in 1 M KCl containing 5 mM  $\text{K}_3\text{Fe}(\text{CN})_6$ . (f) Relationship between reduction peak current density and square root of scan rates.

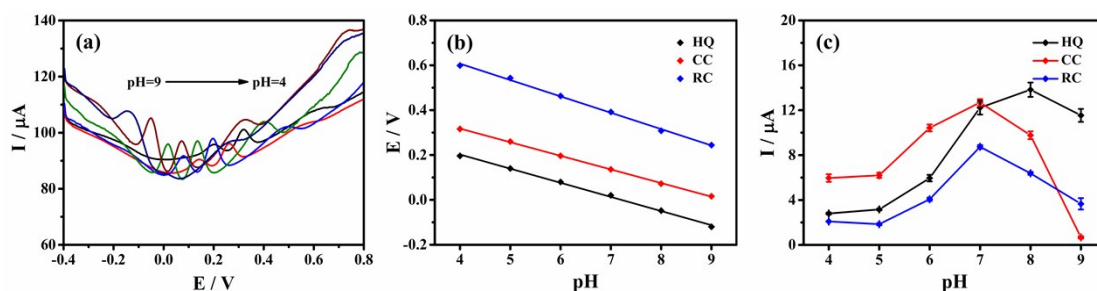

**Fig. S2** (a) Square wave voltammograms of SA-900/GCE in the presence of 0.5  $\mu\text{M}$  HQ, 0.5  $\mu\text{M}$  CC and 5  $\mu\text{M}$  RC at different pH values. (b) Plots of oxidation peak potential versus pH for the three analytes. (c) Effect of pH on the oxidation peak currents. The standard deviations of three measurements are represented by error bars.

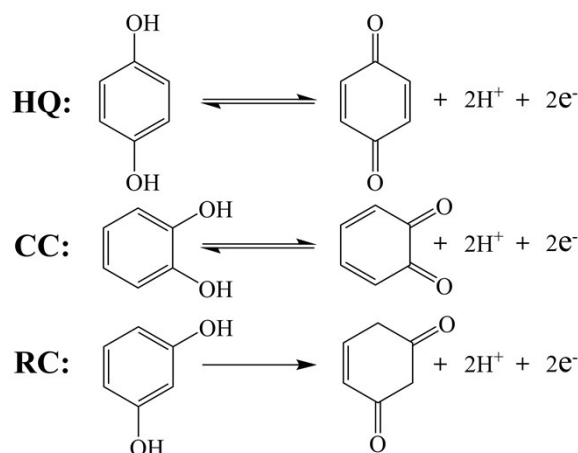

**Fig. S3** Electrochemical reactions of HQ, CC and RC at SA-900/GCE.

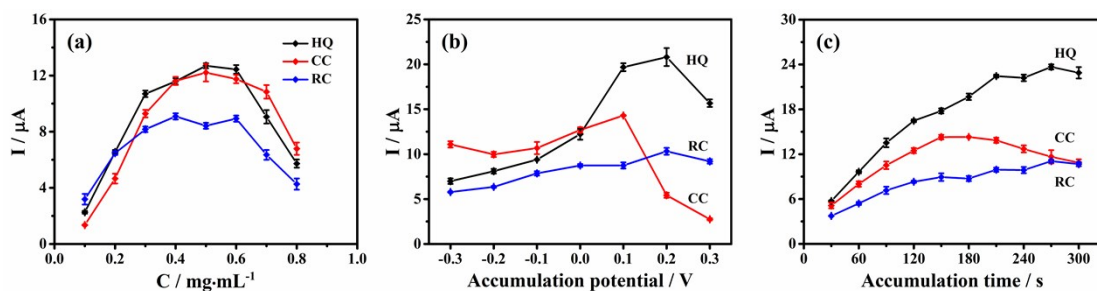

**Fig. S4** Effect of SA-900 concentration (a), accumulation potential (b) and accumulation time (c) on the oxidation peak currents of  $0.5 \mu\text{M}$  HQ,  $0.5 \mu\text{M}$  CC and  $5 \mu\text{M}$  RC on SA-900/GCE. The standard deviations of three measurements are represented as error bars.

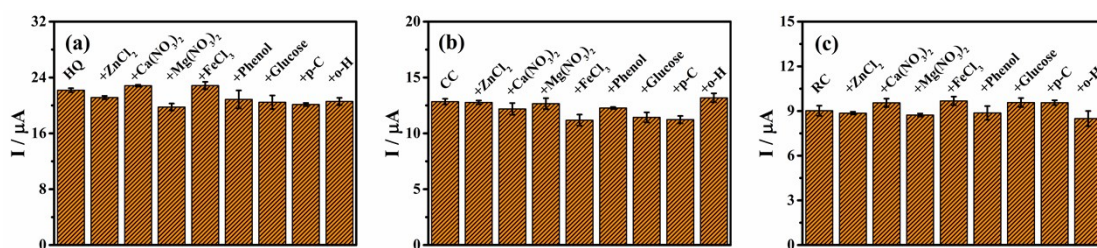

**Fig. S5** Oxidation peak currents for (a)  $0.5 \mu\text{M}$  HQ, (b)  $0.5 \mu\text{M}$  CC and (c)  $5 \mu\text{M}$  RC in the presence of other ions or organic compounds. p-C: p-chlorophenol, o-H: o-Hydroxyaniline.

**Table S1** Parameters for SA-T characterized with N<sub>2</sub> adsorption-desorption method.

| Samples | $S_{\text{BET}} / \text{m}^2\cdot\text{g}^{-1}$ | $V_{\text{total}} / \text{cm}^3\cdot\text{g}^{-1}$ | $D_p / \text{nm}$ |
|---------|-------------------------------------------------|----------------------------------------------------|-------------------|
| SA-700  | 712.7                                           | 0.460                                              | 2.6               |
| SA-800  | 860.6                                           | 0.642                                              | 3.0               |
| SA-900  | 1572.4                                          | 1.198                                              | 3.0               |
| SA-1000 | 1342.5                                          | 1.670                                              | 5.0               |

$S_{\text{BET}}$ : specific surface area is calculated by Brunauer-Emmett-Teller (BET) method,  $V_{\text{total}}$ : total pore volume,  $D_p$ : Average pore diameter.
